# Supplementary material
Source: PubMed Central journal article supplement (PMC4404520)
Supplement: NIHMS636398-supplement-Supplemental_Figure_1.pdf [file NIHMS636398-supplement-Supplemental_Figure_1.pdf]

**Figure S1**

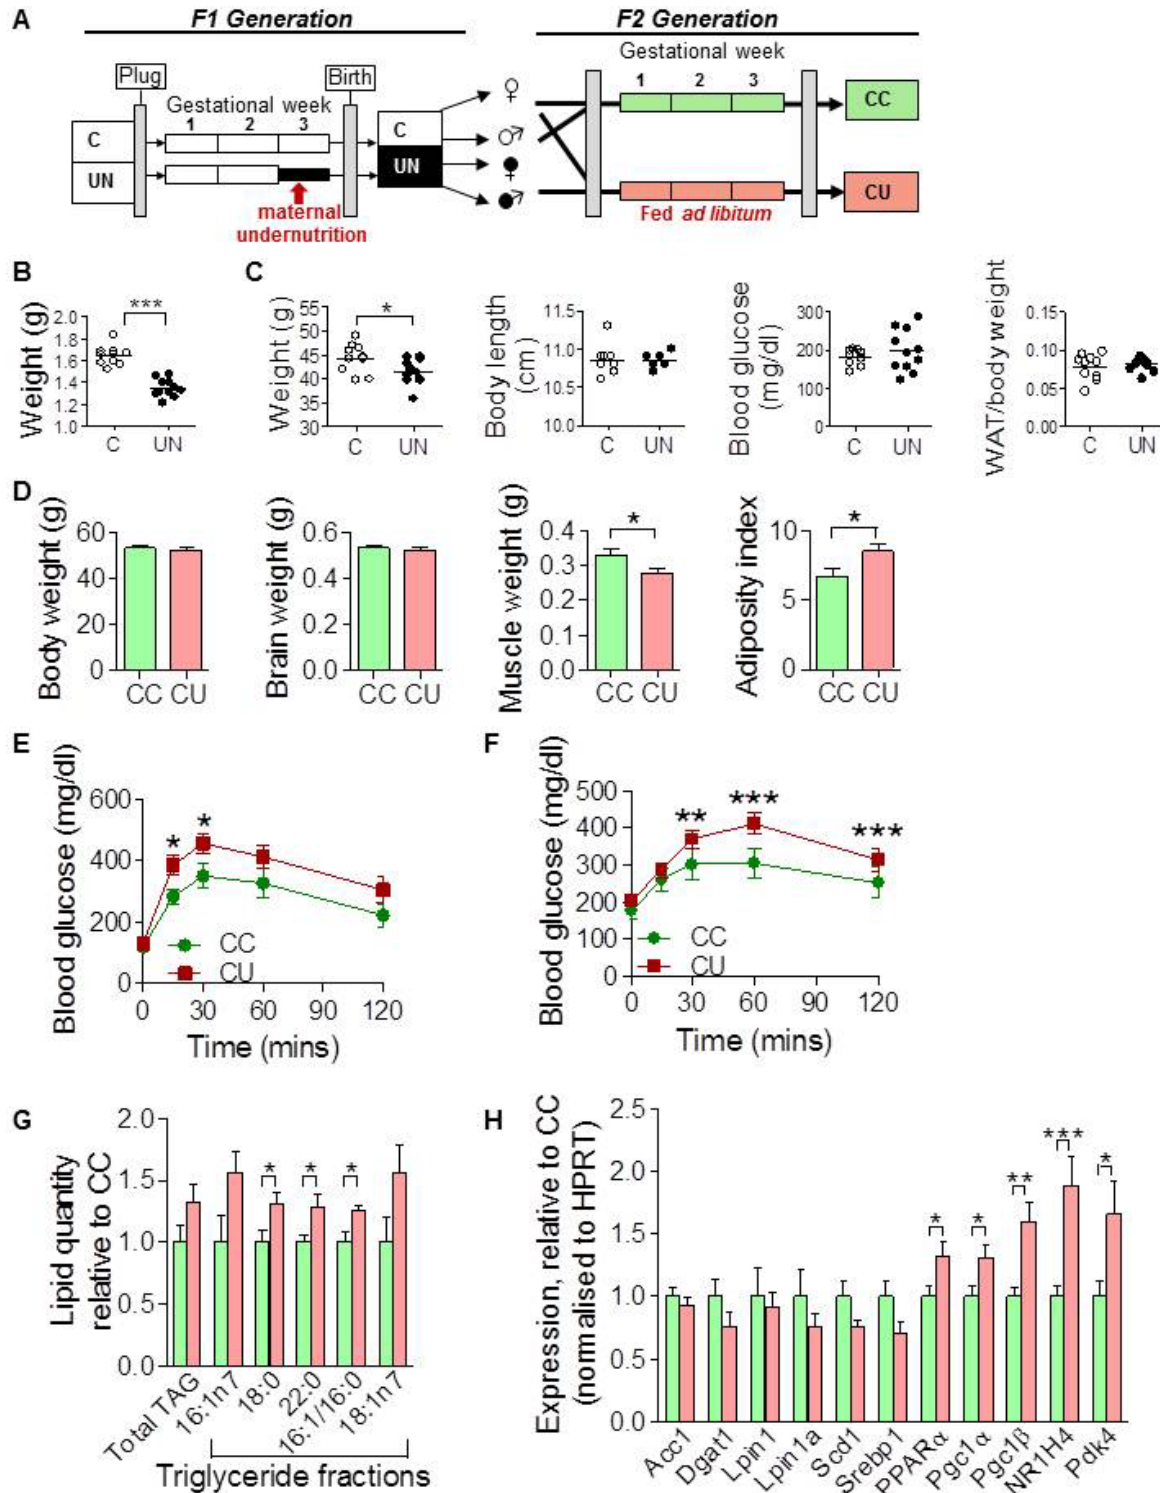

**Fig.S1 Confirmation of F2 metabolic phenotype**

- (A) Experimental design: F1 generation: Dams were randomised on pregnancy day 12.5 to control (C) or undernutrition (UN) groups and UN food intake restricted 50%. Postnatal litters were equalised to eight pups and animals fed *ad libitum*. F2 generation: control F1 females mated at age 2 months with non-sibling control or UN males and fed *ad libitum* to produce: CC - both parents controls; CU - control dam, UN sire.
- (B) F1 birth weight \*\*\* $P < 0.0001$ , unpaired two-tailed Welch's t-test.
- (C) At three months of age UN individuals weigh less than controls ( $P = 0.04$ , unpaired two-tailed Welch's t-test), however, there is no difference in body length, blood glucose or white adipose tissue (WAT, combined mass of gonadal, supraclavicular and peritoneal fat pads) between control and UN males.
- (D) There is no difference in total body weight or brain weight between CC and CU animals at 8 months of age, however there is a significant reduction in muscle mass (sum of gastrocnemius and soleus weight, \* $P = 0.02$ ), and a significant increase in the adiposity index (sum of gonadal, peri-renal, and subcutaneous flank fat pad weight, as % body weight, \* $P = 0.03$ ) at 8 months of age,  $n \geq 12$  per group.
- (E) Intraperitoneal glucose tolerance test at 8 months of age. 1g/kg intraperitoneal glucose was given at 0 minutes to fasted non-diabetic animals; blood glucose was measured at 0, 15, 30, 60 and 120 minutes.  $n \geq 12$  per group. \*  $P < 0.05$ , repeated measures 1-way ANOVA.
- (F) Intraperitoneal pyruvate tolerance test at 8 months of age. 1.5 g/kg intraperitoneal pyruvate was given at 0 minutes to fasted animals; blood glucose was measured at 0, 15, 30, 60 and 120 minutes. \*\*  $P < 0.01$ , \*\*\*  $P < 0.001$  repeated measures 1-way ANOVA  $n \geq 12$  per group.
- (G) Lipidomic analysis of hepatic lipid abundance in E16.5 F2 fetuses. Total triglycerides (TAG)  $P = 0.1$ ; triglyceride fractions: 16:1n7  $P = 0.07$ ; 18:0  $P = 0.04$ ; 22:0  $P = 0.039$ ; 16:1/16:0 ratio (a surrogate measure of Scd1 activity)  $P = 0.028$ . Unpaired two-tailed t-test.
