# Supplementary material
Source: PubMed Central journal article supplement (PMC4404520)
Supplement: NIHMS636398-supplement-Supplemental_Figure_2.pdf [file NIHMS636398-supplement-Supplemental_Figure_2.pdf]

**Figure S2**

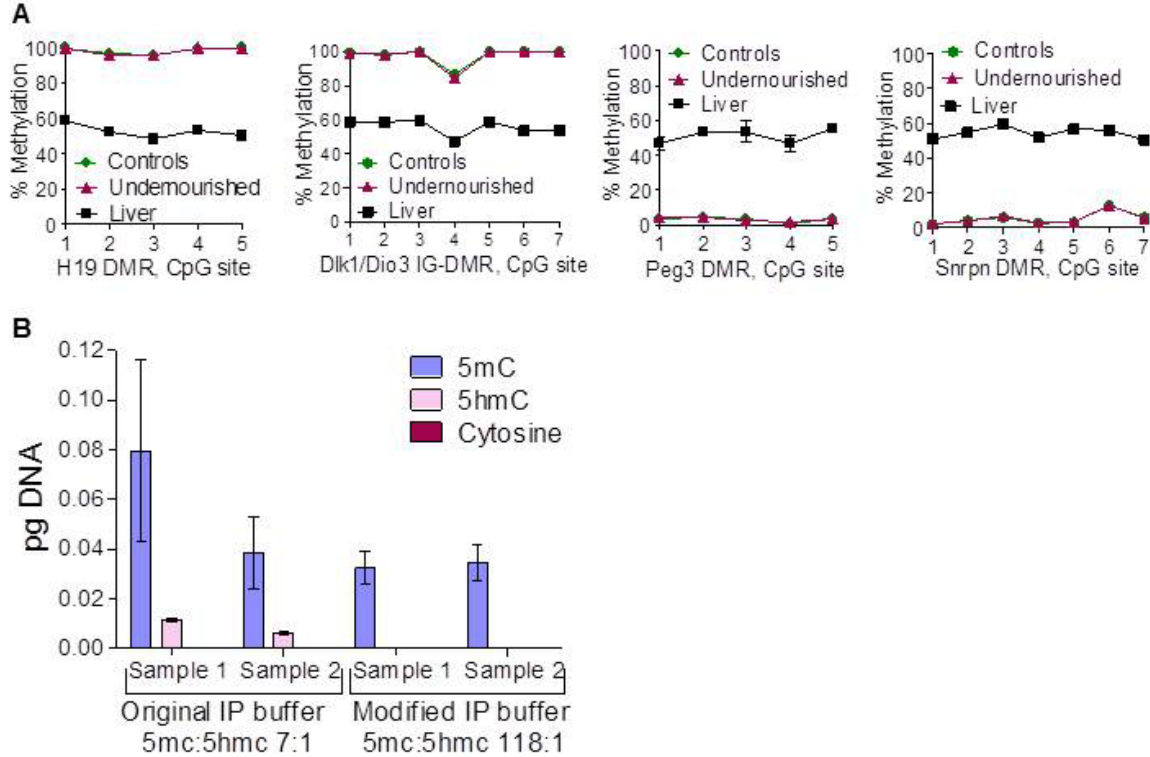

**Fig.S2 Confirmation of sperm purity and validation of immunoprecipitation.**

- (A) Bisulphite mutagenesis and pyrosequencing of imprinting control regions demonstrates the purity of the isolated sperm DNA.
- (B) Immunoprecipitation conditions were optimized to ensure the specificity of MeDIP for methylated cytosine. 1  $\mu$ g of gDNA was spiked with 0.1 pg of synthetic *Arabidopsis Thaliana* sequences containing either C, 5mC, or 5hmC (0.1 pg each), subjected to immunoprecipitation and the yield of 5mC, 5hmC and unmodified cytosine containing fragments quantified. See Materials and Methods for more details.
