# Supplementary material
Source: PubMed Central journal article supplement (PMC4404520)
Supplement: NIHMS636398-supplement-Supplemental_Figure_3.pdf [file NIHMS636398-supplement-Supplemental_Figure_3.pdf]

**Figure S3**

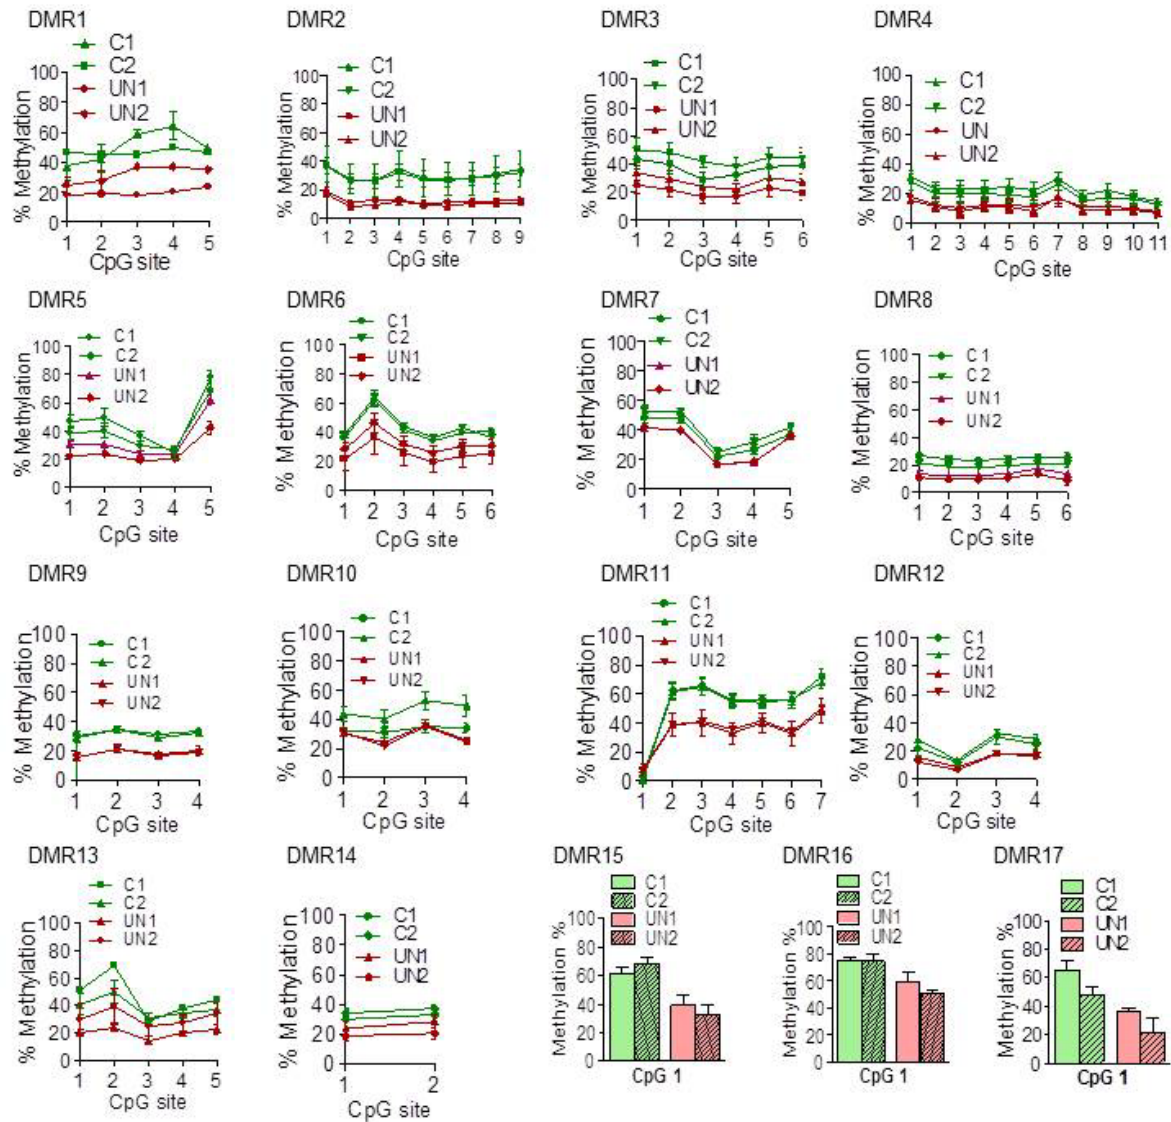

**Fig.S3 DMRs identified by MeDIP-seq have the same absolute level of methylation in the two biological pooled replicate libraries.**

To assess whether the DMRs had similar absolute methylation levels in the two pools assessed by MeDIP-seq, bisulphite validation data are shown for those samples which were represented in MeDIP-seq libraries 1 and 2 for Control (C) and Undernourished (UN) sperm samples. For each group n=4, 4 litters. All data expressed as mean +/- SEM.
