# Supplementary material
Source: PubMed Central journal article supplement (PMC4404520)
Supplement: NIHMS636398-supplement-Supplemental_Figure_5.pdf [file NIHMS636398-supplement-Supplemental_Figure_5.pdf]

**Figure S5**

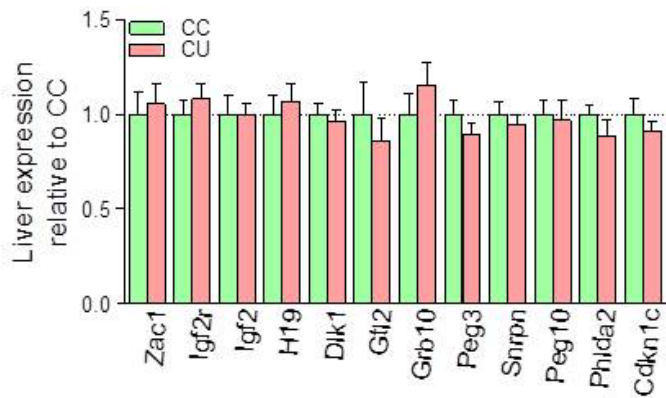

**Fig.S5 Expression of 12 imprinted genes is unaffected in E16.5 F2 liver.**

Imprinted genes have been proposed to be particularly sensitive to expression change in response to environmental perturbation as they are functionally monoallelic. For this reason they have been proposed as good candidates for mediating intergenerational phenotypic inheritance. However, in contrast to genes bordering DMRs we observe no significant changes in expression. Expression assessed by quantitative PCR, normalised to the housekeeping gene *HPRT* which was not changed between CC and CU groups. Data expressed as mean + SEM, relative to CC ( $n \geq 12$  per group).
