# Supplementary material
Source: PubMed Central journal article supplement (PMC4404520)
Supplement: NIHMS636398-supplement-Supplemental_Table_1.pdf [file NIHMS636398-supplement-Supplemental_Table_1.pdf]

**Table S1**

| DMR coordinates                 | MeDIP UN hypo/hyper methylated | Sperm methylation | Blastocyst methylation (26) |
|---------------------------------|--------------------------------|-------------------|-----------------------------|
| DMR18:MMU12:109478201-109478700 | Hypo                           | Ctrl=90% UN=91%   | 25.8%                       |
| DMR19:MMU12:112549801-112550300 | Hypo                           | Ctrl=99% UN=99%   | 23.1%                       |
| DMR20:MMU12:109475001-109475500 | Hypo                           | Ctrl=74% UN=85%   | 33.5%                       |
| DMR21: MMU2:167694001-167694500 | Hypo                           | Ctrl=96% UN=96%   | 6.3%                        |
| DMR22: MMU18:80774801-80775300  | Hypo                           | Ctrl=97% UN=96%   | 5.7%                        |
| DMR23: MMU15:4809001-4809500    | Hypo                           | Ctrl=75% UN=75%   | Not assessed                |
| DMR24: MMU2:127151801-127152300 | Hypo                           | Ctrl=76% UN=87%   | 19.9%                       |
| DMR25: MMU12:71964401-71964900  | Hyper                          | Ctrl=74% UN=74%   | 33.3%                       |
| DMR26: MMU7:53400801-53401300   | Hyper                          | Ctrl=98% UN=97%   | 9.2%                        |
| DMR27: MMU1:170174001-170174300 | Hyper                          | Ctrl=94% UN=94%   | 19.6%                       |
| DMR28: MMU2:126409801-126410300 | Hyper                          | Ctrl=100% UN=100% | 3.3%                        |
| DMR29: MMU2:126435401-126435700 | Hyper                          | Ctrl=95% UN=97%   | 25                          |
| DMR30: MMU1:187298601-187299100 | Hyper                          | Ctrl=95% UN=95%   | 5.6%                        |
| DMR31: MMU5:137955601-137956100 | Hyper                          | Ctrl=50% UN=51%   | 22.8%                       |
| DMR32: MMU4:106155201-106155700 | Hyper                          | Ctrl=93% UN=93%   | 11.4%                       |

**Table S1: Bisulphite mutagenesis analysis of putative DMRs that failed to validate.**

Bisulphite mutagenesis combined with pyrosequencing was used to calculate the absolute level of methylation in C and UN F1 sperm at putative DMRs identified by MeDIP-seq. Controls n=12, 5 litters; UN n=11, 4 litters. Note that those loci verified to have differential methylation are provided in Table 1; the above putative DMRs did not demonstrate differential methylation using pyrosequencing analysis. (Blastocyst methylation level extracted from data presented by Kobayashi *et al.* 2012.)
