# Supplementary material
Source: PubMed Central journal article supplement (PMC4404520)
Supplement: NIHMS636398-supplement-Supplemental_Table_2.pdf [file NIHMS636398-supplement-Supplemental_Table_2.pdf]

**Table S2 part I**

| DMR coordinates                          | Genomic position                                                           | Evidence for a role in <i>cis</i> regulation from ENCODE (51)                                                                                                                                                                                                                          |
|------------------------------------------|----------------------------------------------------------------------------|----------------------------------------------------------------------------------------------------------------------------------------------------------------------------------------------------------------------------------------------------------------------------------------|
| <b>DMR1</b><br>MMU12:19181482-19182200   | CpG island, multiple homologous copies as part of a segmental duplication. | - ESC DNaseI hypersensitivity (HS)                                                                                                                                                                                                                                                     |
| <b>DMR2</b><br>MMU12:111666100-111666400 | CpG island 57.8kb upstream of <i>Ppp2r5c</i> (52)                          | - Heart (8 weeks): H3K36m3<br>- Liver (8 weeks): H3K36m3                                                                                                                                                                                                                               |
| <b>DMR3</b><br>MMU15:78370350-78370800   | CpG island in last exon of <i>Sstr3</i> (52).                              | - Cerebellum (8 weeks): H3K4m1<br>- C2C12 myocytes: Myogenin bound<br>- Heart (8 week): H3K36m3, Pol2 bound                                                                                                                                                                            |
| <b>DMR4</b><br>MMU1:39654450-39655100    | Intergenic                                                                 | Immediately 5' of a region enriched in:<br>- Cerebellum (8 weeks): H3K4m1, DNaseI HS<br>- Cerebrum (8 weeks): DNaseI HS<br>- Liver (8 weeks): H3K4m1, H3K36m3                                                                                                                          |
| <b>DMR5</b><br>MMU3:142351001-142351500  | Intergenic                                                                 | - G1E: DNase I HS<br>- CH12: H3K9me3<br>- Erythroblast H3K9me3<br>- Megakaryocyte H3K27me3<br>- Liver (8 weeks) H3K27me3<br>- Heart (8weeks) H3K27me3                                                                                                                                  |
| <b>DMR6</b><br>MMU17:39984601-39985700   | In <i>Rn45S</i> coding region                                              | - Liver, Heart, Cerebellum (all at 8 weeks): H3K4me1, H3K4me3, H3K27me3, H3K36me3<br>- Cerebellum, heart (8 weeks): CTCF binding<br>- Cerebellum, cerebrum, whole brain and ES-CJ7: DNase I HS                                                                                         |
| <b>DMR7</b><br>MMU10:80033801-80034300   | Intergenic                                                                 | - Cerebellum (8weeks) H3K4me1, H3K27ac, Pol2<br>- Heart (8weeks): H3K4me1<br>- Liver E14.5: H3K4me1 H3K4me3, H3K27a, H3K79me2<br>- MEL: H3K4m1, H3K4me3, H3K27a M3K36m3, Pol2<br>- GIE: DNaseI HS<br>- CH12 cells: H3K4me3/pol2<br>- Erythroblasts and megakaryocytes: H3K4me1 M3K4me3 |
| <b>DMR8</b><br>MMU7: 137835001-137836500 | Intron of <i>Tacc2</i>                                                     | - Cerebellum H3K4m3, H3K27me3, H3K27ac<br>- Cerebrum, whole brain E14.5 and 8weeks DNase I HS<br>- ES-CJ7 DNase I HS<br>- Heart E14.5 H3K4m1, Heart 8w H3K4m3, H3K27me3 H3K79m3, CTCF and Pol2 binding<br>- Liver (8weeks): H3K79me2<br>- CH12: H3K36me3<br>- Megakaryocyte H3K36m3    |
| <b>DMR9:</b><br>MMU7:53354201-53354900   | Exon1 of <i>Kcnj11</i>                                                     | - Cerebellum H3K4m1, H3K27ac<br>- Heart E14.5 H3K4m1, Heart 8w H39ac, H3K27ac H3K27m3, CTCF and Pol2 binding<br>- Liver (8weeks): H3K27me3<br>- CH12: H3K27me3<br>- Megakaryocyte H3K9m3, H3k27m3                                                                                      |
| <b>DMR10:</b> MU11:33922001-33922500     | Intergenic                                                                 | - CH12: H3K9me3<br>- Megakaryocyte H3K4m1                                                                                                                                                                                                                                              |
| <b>DMR11:</b><br>MMU14:75925601-75926100 | Exon2 of <i>Siah3</i>                                                      | - Heart 8w H3K27m3<br>- Liver E. 14.5 H3K4m1, H3K4m3, H3K27ac, H3K36m3<br>- MEL H3K4m1, H3K4m3, H3K9ac, H3K27ac, H3K36m3, p300 and Pol2 binding, DNaseI HS<br>- Erythroblast H3K4m1<br>- MEL H3K4m3, H3K9m3, H3K27m3                                                                   |
| <b>DMR12:</b><br>MMU5:26397201-26397700  | Intergenic                                                                 | - GIE: DNaseI HS<br>- CH12 H3K9m3<br>- Erythroblast H3K27m3<br>- Megakaryocyte H3K27m3<br>- ES-CJ7 DNaseI HS                                                                                                                                                                           |

**Table S2 part II**

| DMR coordinates                         | Genomic position       | Evidence for a role in <i>cis</i> regulation from ENCODE (51)                                                                                                                                                                                                                      |
|-----------------------------------------|------------------------|------------------------------------------------------------------------------------------------------------------------------------------------------------------------------------------------------------------------------------------------------------------------------------|
| <b>DMR13:</b> MMU2:172688001-172688500  | Intergenic             | <ul style="list-style-type: none"> <li>- Cerebellum H3K4m3</li> <li>- Cerebrum and brain DNaseI HS</li> <li>- Heart E14.5 H3K4m1, H3K27a. 8weeks: H3K27m3</li> <li>- Liver H3K27m3</li> <li>- G1E DNaseI HS</li> <li>- CH12 J3K9m3, H3K27m3</li> <li>- ES-CJ7 DNaseI HS</li> </ul> |
| <b>DMR14:</b> MMU12:107752401-107752500 | Intergenic             | <ul style="list-style-type: none"> <li>- CH12 H3K9m3</li> <li>- Erythroblast H3K9m3</li> <li>- Megakaryocyte H3K9m3</li> </ul>                                                                                                                                                     |
| <b>DMR15:</b> MMU11:46390601-46391100   | Exon 3 <i>Bc053393</i> |                                                                                                                                                                                                                                                                                    |
| <b>DMR16:</b> MMU7: 10836601-10837100   | Intergenic             | <ul style="list-style-type: none"> <li>- Megakaryocyte H3K9m3</li> </ul>                                                                                                                                                                                                           |
| <b>DMR17:</b> MMU10:120699201-120699700 | Intergenic             | <ul style="list-style-type: none"> <li>- MEL H3K4m1, H3K36m3</li> <li>- Megakaryocyte H3K9m3</li> </ul>                                                                                                                                                                            |

**Table S2:** Analysis of validated DMRs using the ENCODE (51) datasets suggests cell-type specific enrichment of histone modifications and transcription factor binding characteristic of a role in *cis* regulation of transcription.
