# Supplementary material
Source: PubMed Central journal article supplement (PMC4404520)
Supplement: NIHMS636398-supplement-Supplemental_Table_3.pdf [file NIHMS636398-supplement-Supplemental_Table_3.pdf]

**Table S3: Primers used for RT-qPCR**

| Transcript               | Primers                                            |                           |
|--------------------------|----------------------------------------------------|---------------------------|
| <i>HPRT</i>              | F: CAGGCCAGACTTTGTTGGAT                            | R: TTGCGCTCATCTTAGGCTTT   |
| <i>Sstr3</i>             | F: ATCCCTTGAAGCTGGCAGT                             | R: CAGGGTCCAAGGTCGTAGG    |
| <i>C1qtnf6</i>           | F: GGGGTCTGTGAGTTGAGCTT                            | R:GACCCCAAACACAAGAGGAA    |
| <i>Vim</i>               | F: GGAAAGTGGAAATCCTTGACAG                          | R: TGGACATGCTGTTCCCTGAAT  |
| <i>Gm4983</i>            | F: ACACTTGGGAAACCCATCAT                            | R: GAAGGATCCAGCAAATTCCA   |
| <i>Asap2</i>             | F: TGGACCGGATGGTTCTCTAC                            | R: GCCTGGGTGTACTGTTCCCTC  |
| <i>Pp2r5c Total</i>      | F: TGATCACGGAGCCCATTAC                             | R: ATTGGAGGAAGGTGGCAAG    |
| <i>Ppp2r5c variant1</i>  | F: AGCCAAAGCGAATCCCCAGTATGC R:CAGACGCTAGCGCCCGTCCT |                           |
| <i>Ppp2r5c variant 2</i> | F: AGCGAATCCCCAGGCACAGA                            | R:AGCTGAGGCGGACGTGCATT    |
| <i>Ppp2r5c variant 4</i> | F: ACCAAAACCGGTGAAAAGTG                            | R: CTGGACAACCGTGAGGCTAT   |
| <i>Rnf149</i>            | F: TCTACAACCTGGAGAGCAACG                           | R:CCGTCCTTTTGGGTAGCTAAT   |
| <i>Creg2</i>             | F: ACTGTGTCCACCCACGAAAA                            | R: GATCCCTGTGCTGTTGTGGA   |
| <i>Klf16</i>             | F: CTTCGCACCTCAAGTCACAC                            | R: GGGCGAACTTCTTGTACACAG  |
| <i>Tacc2</i>             | F: AAAGCGGTCTCCTCTGTCTG                            | R: TGGACCACTGTAGAGATGGC   |
| <i>Cclb2</i>             | F: GGGGGCATATGGATCTCTCT                            | R:AACAGTCGTAAAAAGGCACCA   |
| <i>Gbp2</i>              | F: ACCCTGGTTCTGCTTGACAC                            | R: TCCAGCAGTCATTCTGGTTG   |
| <i>Rn45S</i>             | F: ATGCCCTTGGAAGAGAACCT                            | R: GGGAAACCAGAAGACCAACA   |
| <i>Kcnj11</i>            | F: CCCACCCATTCTCTGTCTGT                            | R: ACGATGTCTGGTGGATGTCA   |
| <i>Vrk1</i>              | F: CAGAGGGCTGCTAAACCAGA                            | R:CCCCAATACTTAGGAACACCAA  |
| <i>Kcnip1</i>            | F: TTGTACCGGGGATTCAAAAA                            | R: CTCCGTGAGGGAAAAACTGA   |
| <i>Kcnmb1</i>            | F: GCGAGTGGAGAGAAACCATC                            | R: CCACTGGAGGCAACAGTCAT   |
| <i>Lcp2</i>              | F: GCCTGGAACCTCAGACAACCT                           | R: AAACCGAGCACCATCAATGT   |
| <i>Siah3</i>             | F: CTGGGGCAACTTGTCTGTGTG                           | R: CTACCTTGCTCTGCGGAGTT   |
| <i>Speer4a</i>           | F: GCAGGAGTTCAAGAAGGAGAAA                          | R: GCTGCAATATCGCCAACCTTT  |
| <i>Gm10471</i>           | F: CGTTTGGTGGAGTTGAACCT                            | R: CCAGCTCTCTTGCAGCTTCT   |
| <i>Tfap2c</i>            | F: GAGATGGCTCACCCCATAGA                            | R: GGTCCTTTGCGAATGACAGT   |
| <i>Bmp7</i>              | F: TGGTCATGAGCTTCGTCAAC                            | R: TGGAAAGATCAAACCGGAAC   |
| <i>Tbc1d30</i>           | F: TCTGGGACTCCGTGTTCTTC                            | R:TCTGCTGTCTCGCAACATTC    |
| <i>Wif1</i>              | F: GAGTGTCCGGATGGGTTCTA                            | R: GAAGCCAGGAGTGACACACA   |
| <i>Vmn1r66</i>           | F: GCCATCACCATCAGTCACAG                            | R: TGGACAAAACCCAGAGAAGG   |
| <i>Vmn2r52</i>           | F: ACAGGACCCGATATGACCAC                            | R: TGGAAGTGTAAAGGTCCGTATG |
| <i>SnoRNA202</i>         | Taqman mouse SnoRNA202 assay Cat. # 4427975        |                           |
| <i>MiR715</i>            | Taqman mmu-miR-715 assay. Cat. # 4427975           |                           |

All primers were used at 400nM with an annealing temperature of 60°C.
