# Supplementary material
Source: PubMed Central journal article supplement (PMC4404520)
Supplement: NIHMS636398-supplement-Supplemental_Table_4.pdf [file NIHMS636398-supplement-Supplemental_Table_4.pdf]

**Table S4: Pyrosequencing primers:** (Primers used at 100nM unless otherwise specified)

| Locus coordinates (DMR)                       | Primer sequences<br>[Btn] indicates biotinylated primer                                                     | Annealing temp °C |
|-----------------------------------------------|-------------------------------------------------------------------------------------------------------------|-------------------|
| <b>DMR1</b> MMU12:<br>19181482-19182200       | F: GGTTTATAGGTATAGATAGGTTTTGAGTA<br>R:[Btn]CCTCTATAATCCAACCCTAAAACCTAAC<br>Seq: GTTTAGTTTTAGGGTTGTTGGG      | 57                |
| <b>DMR2</b> MMU12:<br>112600900-<br>112601120 | F: GTAGTGAAGAAAGTTAGG<br>R:[Btn]ACAACCTACCATAACCAAAAACATTAACC<br>Seq: AAAAGGGATTATAAGAGAGTAGTAGTGT          | 60                |
| <b>DMR3</b> MMU15:<br>78370350-78370800       | F: TTGAAGATGTTGAGTAGATAGAAAAGGTATT<br>R:[Btn]CCCCTACTAATCATCTACTTATACTACT<br>Seq: ATTATTATGAGTGTGATTTTG     | 60                |
| <b>DMR4:</b> MMU1:<br>39654450-39655100       | F: AGTTTTTTTAGGTTGAAGTTTTGTTAGTA<br>R: [Btn]TAATCCTAAAACCCCATTTCCACAA<br>Seq: ATGGGTTTGAGGGGG               | 60                |
| <b>DMR5:</b> MMU3:<br>142351001-<br>142351500 | F: TGATGGTAAGTGTGGGTATTAG<br>R: [Btn]CCCCTCTTTCTTTTCTTACCTAT<br>Seq: GTAAGTGTGGGTATTAGT                     | 60                |
| <b>DMR6:</b> MMU17:<br>39984601-39985700      | F: AGGTTTGTGATGTTTTTAGATGT<br>R:[Btn]ACTTATAACCCCACTTACTAAAAATTCCT<br>Seq: ATTGGTTTAGAGTGTGTTTTATTTTA       | 60                |
| <b>DMR7:</b> MMU10:<br>80033801-80034300      | F: AGTTTTAGTTATAGGGGAGATAGAGGT<br>R: [Btn]ATCCAAACCAAACCTTTAACATCTATAC<br>Seq: GTTAGGAGTTTGTAGTTT           | 55                |
| <b>DMR8:</b> MMU7:<br>137836001-13783650      | F: GGATGTTAGTAGTTGTTTTATTTGTAGTG<br>R: [Btn]ACCTCAAAAACCTCCAAATTCAAATC<br>Seq: GTTGTTTTATTTGTAGTGTAGTA      | 55                |
| <b>DMR9:</b> MMU7:<br>53354201-53354900       | F:TGGTGGTGTAGGTTATTAGGAGTT<br>R:[Btn]TTATACCTCTCCACCAAATAAACATCC<br>Seq: TGTAGGTTATTAGGAGTTAG               | 54                |
| <b>DMR10:</b> MMU11:<br>33922001-33922500     | F:AGGGTTTAGTAGTTTGTTTTTATGTGTAG<br>R:[Btn]CACAACCTTATCCTCTAACATCCACATAT<br>Seq: GTGTGTGTGTGTGTA             | 54                |
| <b>DMR11:</b> MMU14:<br>75925601-75926100     | F:GAGATTTGTTTTGGAGTGTGTG<br>R:[Btn]ACATCTCTACAACATCCCTAACT<br>Seq: ATTGGTTTAGTTTTTTTTTGATAA                 | 54                |
| <b>DMR12:</b> MMU5:<br>26397201-26397700      | F:GGTGTGGGAGAGTAGATTTTA<br>R:[Btn]ACTCCTCCTACTCTAATATCCTATA<br>Seq: GTTAAGAGGATTGAGGT                       | 54                |
| <b>DMR13:</b> MMU2:<br>172688001-172688500    | F: [Btn]GTTTGGTAAATGTTTATAGTGTTTAGTAAG<br>R: CCAACTATACTAATCAAAAATACTTTACTT<br>Seq: AATCAAAAATACTTTACTTCAAC | 57                |
| <b>DMR14:</b> MMU12:<br>107752401-107752500   | F:ATGATTAGTTTGTAGTTTAAAGGTTAGT<br>R:[Btn]CCCTTCAATAATTAACAAACACAATCTCA<br>Seq: TTTGGTTATTATAGGGAGG          | 54                |
| <b>DMR15:</b> MMU11:<br>46390601-46391100     | F:GGAAGTTTATGGAATAGGAGGTGATT<br>R:[Btn]ATCCAAACCAATTTTATCCACATATATC<br>Seq: AGGAGGTGATTTTGTGA               | 54                |
| <b>DMR16:</b> MMU7:                           | F: AGTAAAGGTGGAATTTGTTTTAGATTTAT                                                                            | 57                |

|                                             |                                                                                                             |                      |
|---------------------------------------------|-------------------------------------------------------------------------------------------------------------|----------------------|
| 10836601-10837100                           | R: [Btn]CCACCCTAATTACCACCCTAAACTTCAA<br>Seq: TTTTTAGTTGGTTTTGTTTTAGAG                                       |                      |
| <b>DMR17:</b> MMU10:<br>120699201-120699700 | F: GTGGTAGTGGGAGAAAGTTAATTATAT<br>R: [Btn]AACCTAACAAACAACCCACACAT<br>Seq: ATTAAAAGTAATTAATAAAAAAAGGA        | 57                   |
| <b>DMR18:</b> MMU12:<br>109478201-109478700 | F:TGTTTGGTTATATGGGTATGGT<br>R:[Btn]ACCCTAACACAAACTCTTATTCTAATC<br>Seq:AGGTTGTAATTTAATATTGTGAT               | 54                   |
| Locus coordinates<br>(DMR)                  | Primer sequences<br>[Btn] indicates biotinylated primer                                                     | Annealing<br>temp °C |
| <b>DMR19:</b> MMU12:<br>112549801-112550300 | F:GAGAGAAAGGAAATTTAAGATGAGTATAAG<br>R:[Btn]TAACCTCAAACCTAATCTTCATACC<br>Seq: AGATGAGTATAAGGTGGAA            | 54                   |
| <b>DMR20:</b> MMU12:<br>109475001-109475500 | F:GTGTTTGTAGGGATATATGGTATGG<br>R:[Btn]ATCAAAATTCAAATACCCAAAATCCA<br>Seq: GTTTGTAGTTTTAGTTGGTTTA             | 54                   |
| <b>DMR21:</b> MMU2:<br>167694001-167694500  | F:TGGAGAGAGATGGGAAGAAG<br>R:[Btn]AACTCCATAAAACAACAAACTACC<br>Seq: AGATGGGAAGAAGAGA                          | 57                   |
| <b>DMR22:</b> MMU18:<br>80774801-80775300   | F:TTTGTGGAGGGGATAATTGT<br>R:[Btn]ACAACCTAAAAAAACAAAATTCTACAT<br>Seq: GTTTTGAAATAGGTTGGAG                    | 57                   |
| <b>DMR23:</b> MMU15:<br>4809001-4809500     | F: GGGAAGGTAGAGTATAAGTAGTTATAAG<br>R: [Btn]ATTTCATTTTCCATAATTCATATTCC<br>Seq: ATTTGTTTATTATTTAGAATATAGG     | 57                   |
| <b>DMR24:</b> MMU2:<br>127151801-127152300  | F:TGGGGTTGTTATTGAGTTGG<br>R:[Btn]CTTCCACCCACAACCTTCATT<br>Seq: GGATGTGTGAAAGTTTTATAG                        | 57                   |
| <b>DMR25:</b> MMU12:<br>71964401-71964900   | F:GATTTTGTAGTTTTGGAAGAGAGG<br>R:[Btn]AAAAAACCAATAACACACAACCTATTC<br>Seq TGTTTGTTTATTTTTGTTTAAGAG            | 54                   |
| <b>DMR26:</b> MMU7:<br>53400801-53401300    | F: TTGGGATTGATTTTGTGGTTTTAA<br>R: [Btn]AAAATACCACCAATCCCTCTTCA<br>Seq: GATTTTTATAGTTAATGTTTTTTGA            | 57                   |
| <b>DMR27:</b> MMU1:<br>170174001-170174300  | F: [Btn]TAGTTTATAGAGAAGTTAATTATGGTTTTG<br>R: CTCTTCCTATTCCATAACCCAACACATTT<br>Seq: ACATTTCCATTAATAAACCACA   | 57                   |
| <b>DMR28:</b> MMU2:<br>126409801-126410300  | F: GTTATTAATTGGTTGTGTAAGAGATGT<br>R:[Btn]CCCAAACCTAAAATTCTTCCCTAATATA<br>Seq: ATTGAAGTTTTATTTAGTTTTAGAT     | 57                   |
| <b>DMR29:</b> MMU2:<br>126435401-126435700  | F:GGTTTTGAGATTGTTGTTAGTGTAGTTA<br>R:[Btn]ATCTATAAACCAATCACCCACAACCC<br>SeqTGTTAGTGTAGTTAGAGGA               | 57                   |
| <b>DMR30:</b> MMU1:<br>187298601-187299100  | F:TTTTTTTAGTTGTTATTGGATTTTTTGTA<br>R:[Btn]CCCCACCTCTAAATAAAAACTATAAAT<br>Seq: TTTTAATATTTTATTGGATGTAGT      | 57                   |
| <b>DMR31:</b> MMU5:<br>137955601-137956100  | F: GTTTTTTTAGTGTGGGGAAGAAGT<br>R: [Btn]CTCAAACCTCCACATACATACCATAAC<br>Seq: AGGGTTGTTTAGTGG                  | 57                   |
| <b>DMR32:</b> MMU4:<br>106155201-106155700  | F: GAGAGTTGGAAGGGTTGATATAGATAA<br>R: [Btn]CCAAATCAAACAACCTTCATAAAACAAACTA<br>Seq: AATAAAAAGTAGTTTAGATGAGATA | 57                   |
