# Supplementary material
Source: PubMed Central journal article supplement (PMC4404520)
Supplement: NIHMS636398-supplement-Supplemental_Table_5.pdf [file NIHMS636398-supplement-Supplemental_Table_5.pdf]

**Table S5: MeDIP-seq mapped sequence yield**

|                   | Sequencing<br>run length | Mapped sequence<br>yield (million reads) |
|-------------------|--------------------------|------------------------------------------|
| Control library 1 | 50                       | 285.9                                    |
| Control library 2 | 40                       | 32.7                                     |
| UN library 1      | 50                       | 245.1                                    |
| UN library 2      | 40                       | 56.7                                     |
