# Supplementary material
Source: PubMed Central journal article supplement (PMC4404520)
Supplement: NIHMS636398-supplement-Supplemental_Table_6.pdf [file NIHMS636398-supplement-Supplemental_Table_6.pdf]

**Table S6: Primers for Luciferase assays**

| Locus coordinates                          | Primer sequences                                                             |
|--------------------------------------------|------------------------------------------------------------------------------|
| <b>DMR1</b> MMU12:<br>19181482-19182200    | F: ggcctctagaGCTAGAGGTCATGGCTGGTG<br>R: ggcctctagaTCTCCCTAGAGCAGGGAACA       |
| <b>DMR2:</b> MMU12:<br>112600900-112601120 | F: ggcctctagaAGGAGCCATAAGAGGCCAAT<br>R: ggcctctagaAAAGGCAGCAAGTTCCTTCA       |
| <b>DMR3:</b> MMU15:<br>78370350-78370800   | F: ggcctctagaTGAGCAAGTAGCACAAGCAGA<br>R: ggcctctagaCTGGTGTACCTGGTGGTGTG      |
| <b>DMR4:</b> MMU1:<br>39654450-39655100    | F: ggcctctagaATCACGGGTCCTGTCAGCTT<br>R:<br>ggcctctagaTCCATTTAAACTGTTTCCTGTTC |
| <b>DMR5:</b> MMU3:<br>142351001-142351500  | F: ggcgctagcCTGTTTTCTTCGGACCAGC<br>R: ggcgctagcGAGGTCTGCTCACGGTGC            |
| <b>DMR6:</b> MMU17:<br>39984601-39985700   | F: ggcctctagaGGGAGTATGGTTGCAAAGC<br>R: ggcgctagcAACGACCGACTTCCCTACG          |
| <b>Ctrl1:</b> MMU2:<br>77723600-77723900   | F: ggcctctagaGGGTGGAAACAGAACATTGC<br>R: gcctctagagAAATCTCAAGAGCCTCTCACA      |
| <b>Ctrl2:</b> MMU17:<br>87639700-87640000  | F: ggcctctagaCATGGAAGAGGCTTTGCCTA<br>R: ggcctctagaTTGCCTACATCTCCCTGGAC       |
